# Supplementary figures and images for: PHLPP Inhibitor NSC74429 Is Neuroprotective in Rodent Models of Cardiac Arrest and Traumatic Brain Injury
Source: MDPI journal article supplement (doi:10.3390/biom12101352), 2022-09-23

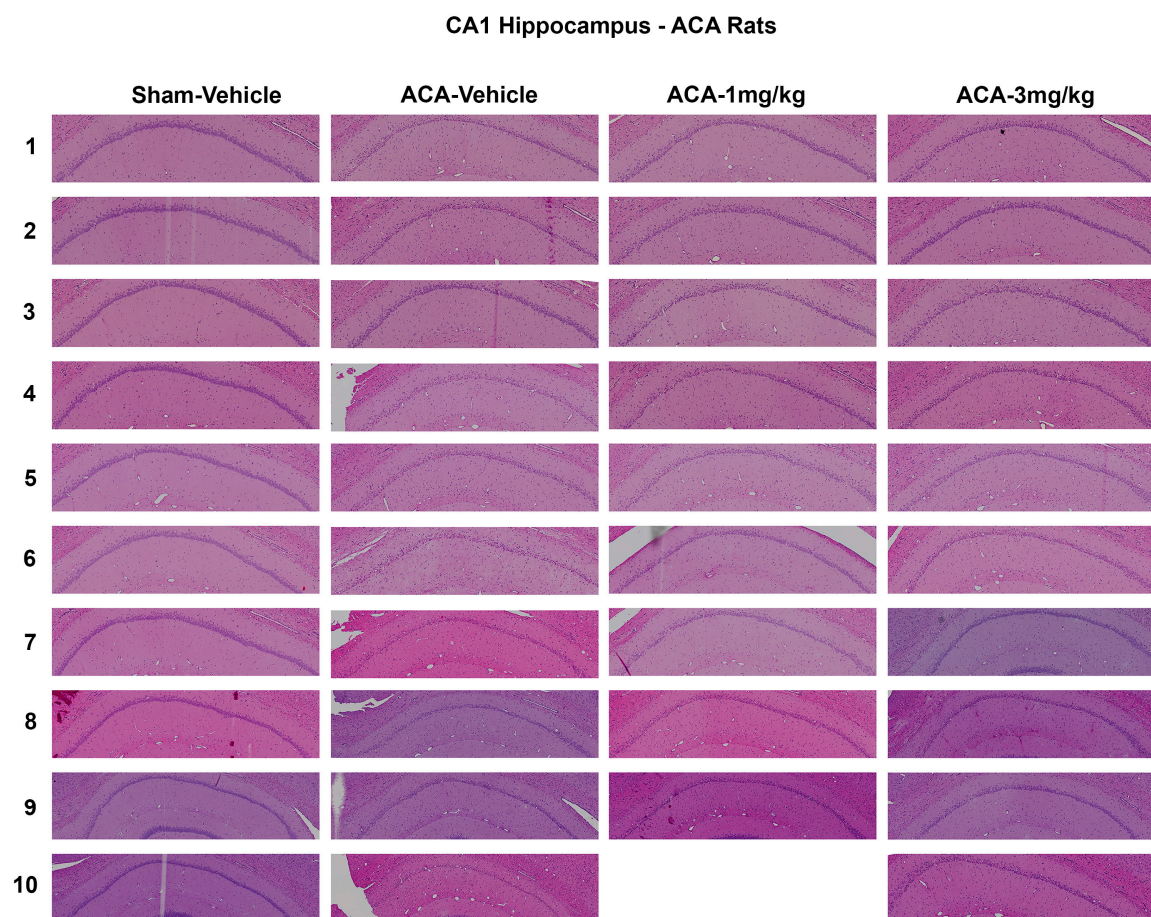

**Figure S1:** H&E Staining of CA1 in All Animals in the ACA Study

Supplement: s1 [file s1]
